# Supplementary material for: A bound-constrained formulation for complex solution phase minimization
Source: Copernicus journal article supplement (doi:10.5194/gmd-18-6951-2025), 2025-10-09
Supplement: Supplementary file [file gmd-18-6951-2025-supplement-title-page.pdf › gmd-18-6951-2025-supplement-title-page.pdf]

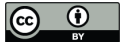

## *Supplement of*

# **A bound-constrained formulation for complex solution phase minimization**

Nicolas Riel et al.

*Correspondence to:* Nicolas Riel ([nriel@uni-mainz.de](mailto:nriel@uni-mainz.de))

- [gmd-18-6951-2025-supplement-title-page.pdf](#)
- GradientBasedMinimizers
  - .DS\_Store
  - Project.toml
  - README.md
  - inequality\_constrained\_CCSAQ\_SLSQP
    - \* NLOpt\_call\_using\_MAGEMin.jl
    - \* functions
  - src
    - \* GradientBasedMinimizers.jl
  - unconstrained\_CG\_BFGS
    - \* functions
    - \* nullMin.jl

The copyright of individual parts of the supplement might differ from the article licence.
